# Supplementary material for: In-depth understanding of a nano-bio interface between lysozyme and Au NP-immobilized N-doped reduced graphene oxide 2-D scaffolds
Source: Royal Society of Chemistry journal article supplement (doi:10.1039/d0na00155d), 2020-01-01
Supplement: d0na00155d1.pdf [file d0na00155d1.pdf]

**Supporting Information**

**In depth understanding of nano-bio interface between lysozyme and Au NPs immobilized N-doped reduced graphene oxide 2-D scaffolds.**

Karan Chaudhary<sup>†</sup>, Krishan Kumar<sup>†</sup>, Pannuru Venkatesu\* and Dhanraj T. Masram\*

Department of Chemistry, University of Delhi, Delhi, 110 007, India

<sup>†</sup> Both authors have equal contribution

### **Table of content**

| <b>Title</b>                                                                                                                                                                          | <b>Page No.</b> |
|---------------------------------------------------------------------------------------------------------------------------------------------------------------------------------------|-----------------|
| Fig. S1 FTIR spectrum of (i) GO, (ii) N-rGO, and (iii) Au(0)-NrGO.                                                                                                                    | 3               |
| Fig. S2 EDX analysis indicating the elemental composition for Au(0)-NrGO.                                                                                                             | 3               |
| Fig. S3 TEM images for samples of Lys with various concentration of Au(0)-NrGO (a) 50 $\mu\text{g/mL}$ , (b) 200 $\mu\text{g/mL}$ (c) 800 $\mu\text{g/mL}$ .                          | 4               |
| Fig. S4 SEM images of lyophilized powder samples of Lys with various concentration of Au(0)-NrGO (a) 400 $\mu\text{g/mL}$ , (b) 600 $\mu\text{g/mL}$ , and (c) 800 $\mu\text{g/mL}$ . | 4               |

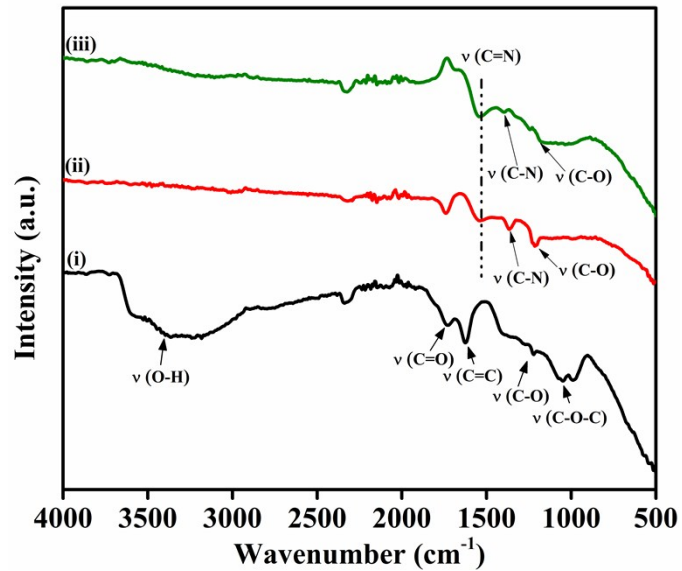

Fig. S1 FTIR spectrum of (i) GO, (ii) N-rGO, and (iii) Au(0)-NrGO.

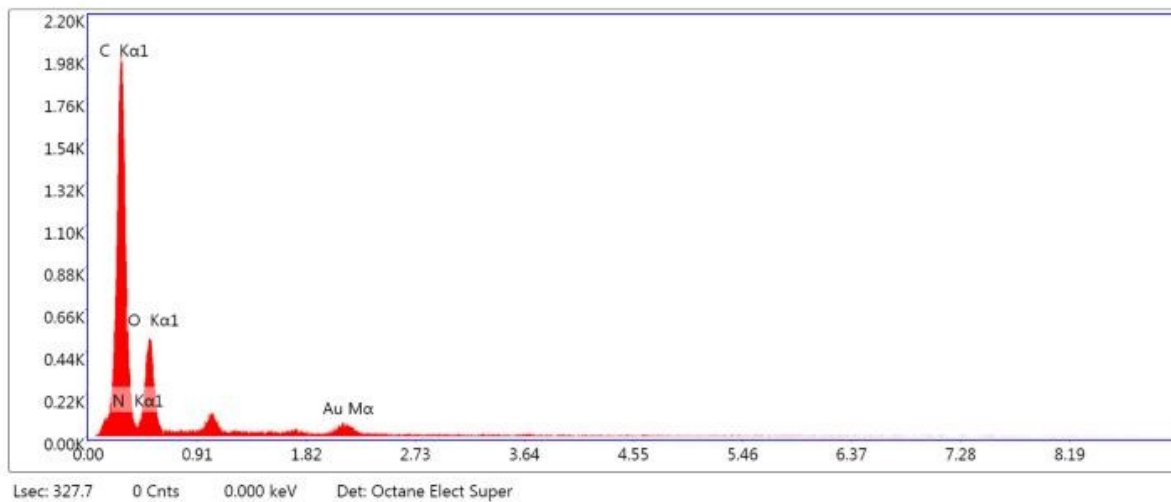

Lsec: 327.7 0 Cnts 0.000 keV Det: Octane Elect Super

**eZAF Smart Quant Results**

| Element | Weight % | Atomic % | Net Int. | Error % | Kratio | Z      | A      | F      |
|---------|----------|----------|----------|---------|--------|--------|--------|--------|
| C K     | 62.77    | 70.64    | 114.70   | 4.15    | 0.5353 | 1.0380 | 0.8215 | 1.0000 |
| N K     | 11.73    | 11.32    | 5.90     | 18.70   | 0.0239 | 1.0068 | 0.2024 | 1.0000 |
| O K     | 20.99    | 17.74    | 22.80    | 11.75   | 0.0664 | 0.9801 | 0.3226 | 1.0000 |
| AuM     | 4.51     | 0.31     | 2.90     | 15.17   | 0.0281 | 0.5124 | 1.2180 | 0.9977 |

Fig. S2 EDX analysis indicating the elemental composition for Au(0)-NrGO.

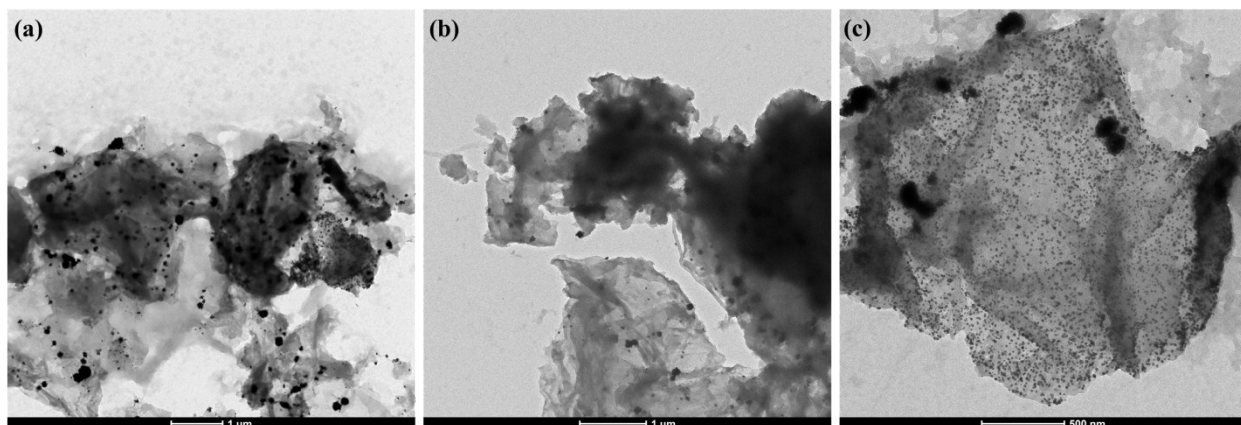

Fig. S3 TEM images for samples of Lys with various concentration of Au(0)-NrGO (a) 50  $\mu\text{g/mL}$ , (b) 200  $\mu\text{g/mL}$  (c) 800  $\mu\text{g/mL}$ .

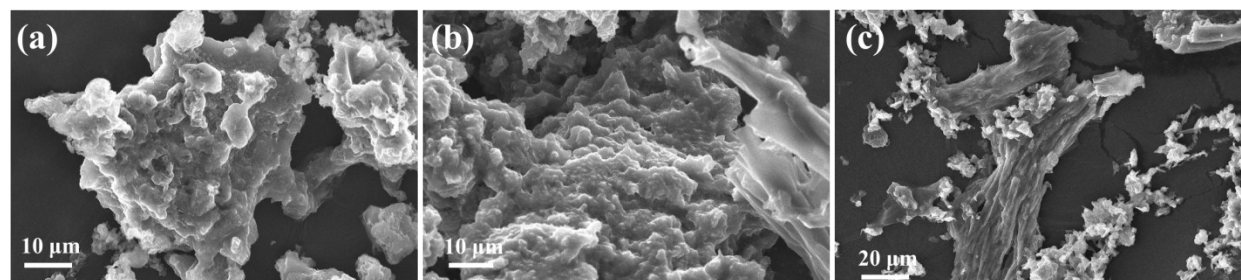

Fig. S4 SEM images of lyophilized powder samples of Lys with various concentration of Au(0)-NrGO (a) 400  $\mu\text{g/mL}$ , (b) 600  $\mu\text{g/mL}$ , and (c) 800  $\mu\text{g/mL}$ .
